# Supplementary material for: Schooling amidst a pandemic: parents’ perceptions about reopening schools and anticipated challenges during COVID-19
Source: bioRxiv or medRxiv preprint supplement (doi:10.1101/2021.03.02.21252777), 2021-03-05
Supplement: Supplementary file [file media-1.pdf]

**S1 Table.** Survey questions included in this analysis

|                                                                                                                                                                                                        |                                                                                                                                                                                                                                                                                                                                                                                                                                                                                                                                                                                                                                                                                                                           |
|--------------------------------------------------------------------------------------------------------------------------------------------------------------------------------------------------------|---------------------------------------------------------------------------------------------------------------------------------------------------------------------------------------------------------------------------------------------------------------------------------------------------------------------------------------------------------------------------------------------------------------------------------------------------------------------------------------------------------------------------------------------------------------------------------------------------------------------------------------------------------------------------------------------------------------------------|
| At this time, are you planning to return your child to school for the 2020-2021 school year                                                                                                            | 1=Yes<br>0=No<br>2=Unsure<br>3=It depends on what plans the school district makes<br>4=Prefer not to say                                                                                                                                                                                                                                                                                                                                                                                                                                                                                                                                                                                                                  |
| Which of the following statements are true when thinking of the 2020-2021 school year? Select all that apply                                                                                           | 1= My child cannot carry out distance learning from home due to lack of child care<br>2= Carrying out distance learning from home will place an extremely difficult burden on my family<br>3= My child will require supervision at school before the school day begins<br>4= My child will require supervision at school after the school day ends<br>5= My child will rely on the school/district for meals and receiving enough food<br>6= My child will rely on school district transportation (school bus)<br>7= None of these apply to me<br>8= Prefer not to say                                                                                                                                                    |
| Do you have access to necessary technology resources (e.g., Laptop, High-speed internet) to support your child's remote learning, if required ?                                                        | 1=Yes<br>2=No<br>3=Didn't need to use any technology<br>98=Prefer not to say                                                                                                                                                                                                                                                                                                                                                                                                                                                                                                                                                                                                                                              |
| Which of the following statements best describes your overall feeling about returning your child to school?                                                                                            | 1 = My child will only return if there is a vaccine available<br>2 = My child will only return if social distancing, handwashing, face-covering guidelines, and temperature checks are encouraged<br>3 = My child will only return if social distancing, handwashing, face-covering guidelines, and temperature checks are enforced<br>4 = My current financial situation will force me to send my child back to school because I/we work and cannot afford childcare<br>5 = My child will return based on whatever safeguards the school district has in place<br>6 = Prefer not to say<br>7 = Other                                                                                                                     |
| Many factors are important to consider when we reopen schools. Please select your <b>top five</b> priorities regarding health safety practices if schools were to open for in-person classes this fall | 1=COVID-19 vaccine availability<br>2=COVID-19 testing and COVID-19 antibody testing availability<br>3=Availability of masks/face-coverings for everyone<br>4= Requirement for teachers/staff to wear a mask/face-covering<br>5= Requirement for students to wear a mask/face-covering<br>6= Regularly scheduled, adult supervised hand-washing<br>7= Staff are trained on CDC guidance to reduce likelihood of COVID-19 transmission<br>8= Temperature screening for students and staff each day<br>9=Hand sanitizer is provided in each classroom and is frequently used<br>10=Cafeteria seating is spaced for proper social distancing and food in individually packaged<br>11= Staggering schedules to reduce crowding |

|  |                                                                                                                                |
|--|--------------------------------------------------------------------------------------------------------------------------------|
|  | 12= Limiting classroom seating to maintain social distancing<br>13= Enhanced cleaning of surfaces in the schools.<br>14= Other |
|--|--------------------------------------------------------------------------------------------------------------------------------|

**S2 Table.** Parents' plans to return their children to school in the 2020-2021 academic year

|                              | Parents plans to return their children to school during the 2020-2021 academic year |             |                               |                |         |
|------------------------------|-------------------------------------------------------------------------------------|-------------|-------------------------------|----------------|---------|
|                              | Yes<br>N (%)                                                                        | No<br>N (%) | Depends <sup>a</sup><br>N (%) | Total<br>N (%) | p-value |
| <b>Age</b>                   |                                                                                     |             |                               |                |         |
| 18-24                        | 25 (10.04)                                                                          | 10 (6.25)   | 7 (7.61)                      | 42 (8.38)      |         |
| 25-34                        | 101 (40.56)                                                                         | 60 (37.50)  | 31 (33.70)                    | 192 (38.32)    |         |
| 35-44                        | 82 (32.93)                                                                          | 59 (36.88)  | 28 (30.43)                    | 169 (33.73)    |         |
| 45-54                        | 29 (11.65)                                                                          | 24 (15.00)  | 17 (18.48)                    | 70 (13.97)     |         |
| 55+                          | 12 (4.82)                                                                           | 7 (4.38)    | 9 (9.78)                      | 28 (5.59)      | 0.307   |
| <b>Gender</b>                |                                                                                     |             |                               |                |         |
| Female                       | 113 (45.56)                                                                         | 95 (59.38)  | 53 (58.24)                    | 261 (52.30)    |         |
| Male                         | 135 (54.44)                                                                         | 65 (40.63)  | 38 (41.76)                    | 238 (47.70)    | 0.011   |
| <b>Race</b>                  |                                                                                     |             |                               |                |         |
| White                        | 115 (46.18)                                                                         | 64 (40.00)  | 33 (35.87)                    | 212 (42.32)    |         |
| African American             | 58 (23.29)                                                                          | 40 (25.00)  | 25 (27.17)                    | 123 (24.55)    |         |
| Latino                       | 54 (21.69)                                                                          | 48 (30.00)  | 30 (32.61)                    | 132 (26.35)    |         |
| Other                        | 22 (8.84)                                                                           | 8 (5.00)    | 4 (4.35)                      | 34 (6.79)      | 0.136   |
| <b>Education</b>             |                                                                                     |             |                               |                |         |
| HS or less                   | 36 (14.46)                                                                          | 32 (20.00)  | 18 (19.78)                    | 86 (17.20)     |         |
| Associate degree             | 27 (10.84)                                                                          | 24 (15.00)  | 18 (19.78)                    | 69 (13.80)     |         |
| Some college but no degree   | 37 (14.86)                                                                          | 31 (19.38)  | 13 (14.29)                    | 81 (16.20)     |         |
| Bachelors                    | 89 (35.74)                                                                          | 38 (23.75)  | 26 (28.57)                    | 153 (30.60)    |         |
| Graduate                     | 60 (24.10)                                                                          | 35 (21.88)  | 16 (17.58)                    | 111 (22.20)    | 0.088   |
| <b>Income</b>                |                                                                                     |             |                               |                |         |
| <\$20,000                    | 25 (10.04)                                                                          | 22 (13.84)  | 9 (9.78)                      | 56 (11.20)     |         |
| \$20,000 to \$39,999         | 36 (14.46)                                                                          | 24 (15.09)  | 17 (18.48)                    | 77 (15.40)     |         |
| \$40,000 to \$69,999         | 49 (19.68)                                                                          | 39 (24.53)  | 30 (32.61)                    | 118 (23.60)    |         |
| \$70,000 to \$99,999         | 63 (25.30)                                                                          | 32 (20.13)  | 16 (17.39)                    | 111 (22.20)    |         |
| >100K+                       | 76 (30.52)                                                                          | 42 (26.42)  | 20 (21.74)                    | 138 (27.60)    | 0.182   |
| <b>School level of child</b> |                                                                                     |             |                               |                |         |
| Daycare                      | 25 (10.04)                                                                          | 22 (13.75)  | 10 (10.87)                    | 57 (11.38)     |         |
| Elementary & Middle          | 114 (45.78)                                                                         | 83 (51.88)  | 42 (45.65)                    | 239 (47.70)    |         |
| High School                  | 53 (21.29)                                                                          | 30 (18.75)  | 27 (29.35)                    | 110 (21.96)    |         |
| More than one school type    | 57 (22.89)                                                                          | 25 (15.63)  | 13 (14.13)                    | 95 (18.96)     | 0.160   |
| <b>School type of child</b>  |                                                                                     |             |                               |                |         |
| Public                       | 160 (65.31)                                                                         | 106 (67.95) | 69 (75.00)                    | 335 (76.83)    |         |
| Private or religious         | 85 (34.69)                                                                          | 50 (32.05)  | 23 (25.00)                    | 101(23.17)     | 0.236   |

<sup>a</sup>Depends on what plans the district makes

**S3 Table.** Parents' access to technology for remote learning during the 2020-2021 academic year

|                            | Access to tech for remote learning |             |                            |                    |
|----------------------------|------------------------------------|-------------|----------------------------|--------------------|
|                            | Yes<br>n (%)                       | No<br>n (%) | Don't need to use<br>n (%) | p-value            |
| Age                        |                                    |             |                            |                    |
| 18-24                      | 37 (8.67)                          | 4 (6.25)    | 2 (13.33)                  |                    |
| 25-34                      | 154 (36.07)                        | 31 (48.44)  | 9 (60.00)                  |                    |
| 35-44                      | 152 (35.6)                         | 17 (26.56)  | 2 (13.33)                  |                    |
| 45-54                      | 64 (14.99)                         | 6 (9.38)    | 1 (6.67)                   |                    |
| 55+                        | 20 (4.68)                          | 6 (9.38)    | 1 (6.67)                   | 0.135              |
| Gender                     |                                    |             |                            |                    |
| Female                     | 228 (53.4)                         | 30 (47.62)  | 8 (53.33)                  |                    |
| Male                       | 199 (46.6)                         | 33 (52.38)  | 7 (46.67)                  | 0.692              |
| Race                       |                                    |             |                            |                    |
| White                      | 180 (42.15)                        | 27 (42.19)  | 7 (46.67)                  |                    |
| African American           | 105 (24.59)                        | 18 (28.13)  | 3 (20.00)                  |                    |
| Latino                     | 114 (26.70)                        | 13 (20.31)  | 4 (26.67)                  |                    |
| Other                      | 28 (6.56)                          | 6 (9.38)    | 1 (6.67)                   | 0.918              |
| Education                  |                                    |             |                            |                    |
| HS or less                 | 77 (18.03)                         | 8 (12.50)   | 2 (13.33)                  |                    |
| Associate degree           | 59 (13.82)                         | 10 (15.63)  | 1 (6.67)                   |                    |
| Some college but no degree | 70 (16.39)                         | 8 (12.5)    | 5 (33.33)                  |                    |
| Bachelors                  | 129 (30.21)                        | 20 (31.25)  | 4 (26.67)                  |                    |
| Graduate                   | 92 (21.55)                         | 18 (28.13)  | 3 (20.00)                  | 0.620              |
| Income                     |                                    |             |                            |                    |
| <\$20,000                  | 49 (11.50)                         | 9 (14.06)   | 0 (0.00)                   |                    |
| \$20,000 to \$39,999       | 65 (15.26)                         | 8 (12.50)   | 4 (26.67)                  |                    |
| \$40,000 to \$69,999       | 100 (23.47)                        | 15 (23.44)  | 7 (46.67)                  |                    |
| \$70,000 to \$99,999       | 98 (23.00)                         | 12 (18.75)  | 0 (0.00)                   |                    |
| >100K+                     | 114 (26.76)                        | 20 (31.25)  | 4 (26.67)                  | 0.192              |
| School level of child      |                                    |             |                            |                    |
| Daycare                    | 40 (9.37)                          | 11 (17.19)  | 6 (40.00)                  |                    |
| Elementary & Middle        | 208 (48.71)                        | 29 (45.31)  | 6 (40.00)                  |                    |
| High School                | 100 (23.42)                        | 10 (15.63)  | 1 (6.67)                   |                    |
| More than one school type  | 79 (18.50)                         | 14 (21.88)  | 2 (13.33)                  | 0.005 <sup>a</sup> |
| School type of child       |                                    |             |                            |                    |
| Public                     | 299 (71.19)                        | 34 (53.97)  | 7 (46.67)                  |                    |
| Private or religious       | 121 (28.81)                        | 29 (46.03)  | 8 (53.33)                  | 0.004 <sup>a</sup> |

<sup>a</sup>statistically significant at p-value=0.050
